# Supplementary material
Source: publisher figshare collection journal article supplement (https://acs.figshare.com/ndownloader/files/25793599)
Supplement: Supplementary file 1 [file 25793599]

Archive with 3 entries (3 files):
- info.xml
- jz0c02147_high_quality.mp4
- jz0c02147.pdf
