# Supplementary material
Source: publisher figshare collection journal article supplement (https://acs.figshare.com/ndownloader/files/25793599)
Supplement: Supplementary file 1 [file 25793599 › info.xml]

<presentation>
	<article>
		<title>Decoding a Percolation Phase Transition of Water at ~330 K with a Nanoparticle Ruler</title>
		<doi>10.1021/acs.jpclett.0c02147</doi>
		<copyright>American Chemical Society</copyright>
		<narrator>Carlos Brites, Bilin Zhuan</narrator>
		<contact>Carlos Brites, Bilin Zhuan</contact>
		<contact-email>carlos.brites@ua.pt, zhuang.bilin@yale-nus.edu.sg</contact-email>
		<author-list>
			<author>Xiaogang Liu</author>
		</author-list>
	</article>
	<slides height-width-ratio=".75">
		<slide audio-time="19">
			<subtitle/>
		</slide>
		<slide audio-time="26">
			<subtitle/>
		</slide>
		<slide audio-time="45">
			<subtitle/>
		</slide>
		<slide audio-time="90">
			<subtitle/>
		</slide>
		<slide audio-time="157">
			<subtitle/>
		</slide>
		<slide audio-time="34">
			<subtitle/>
		</slide>
		<slide audio-time="35">
			<subtitle/>
		</slide>
		<slide audio-time="1">
			<subtitle/>
		</slide>
	</slides>
	<audio duration="407"/>
</presentation>
